# Supplementary material
Source: Springer Nature journal article supplement (https://www.springermedizin.de/resource/supplementary/12889_2011_4023_MOESM2_ESM.pdf/9490982)

**Natural environment**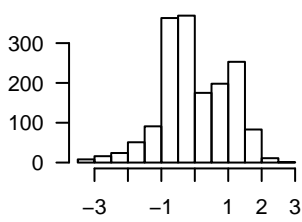**Flood non-affectedness**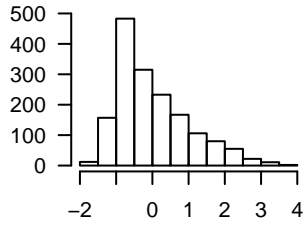**Housing quality**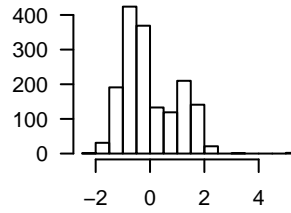**Basic services**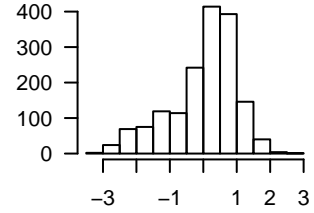**Household wealth**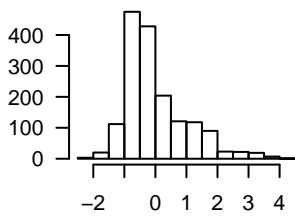**Sanitation**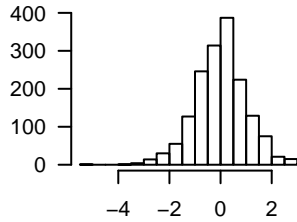**Housing sufficiency**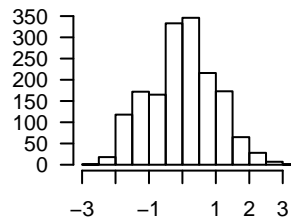**Housing durability**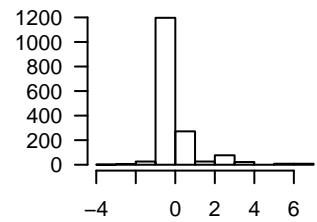**Population density**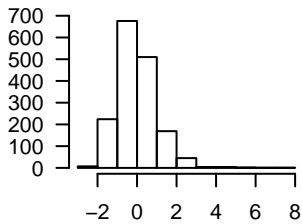**Job satisfaction**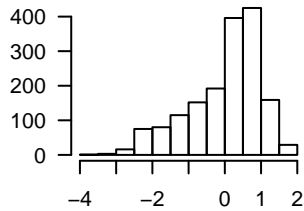**Income generation**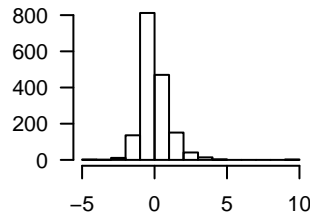**Smoking behaviour**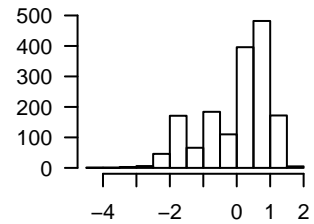**Environmental health knowledge**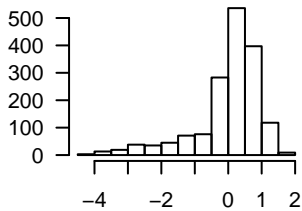**Personal health knowledge**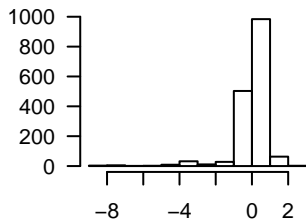

Supplement: MOESM2 [file 9490982]
